# Supplementary material
Source: MDPI journal article supplement (https://www.mdpi.com/2073-4395/12/2/463)
Supplement: s1 [file s1]

Article

# The effect of an engineered biostimulant derived from *Ascomyces nodosum* on grass yield under a reduced nitrogen regime in an agronomic setting

Patrick Quille<sup>1,4</sup>, Aisling Claffey<sup>2</sup>, Ewan Feeney<sup>3</sup>, Joanna Kacprzyk<sup>4,5,6</sup>, Carl K-Y. Ng<sup>4,5,6</sup>, Shane O'Connell<sup>1,3\*</sup>

<sup>1</sup>Plant Biostimulant Group, Shannon Applied Biotechnology Centre, Munster Technological University-Kerry, Tralee, Ireland

<sup>2</sup>J. Grennans & Sons, Rath, Birr, Offaly, Ireland

<sup>3</sup>Brandon Bioscience, Tralee, Ireland

<sup>4</sup>UCD School of Biology and Environmental Science, <sup>5</sup>UCD Centre for Plant Science, <sup>6</sup>UCD Earth Institute, University College Dublin, Belfield, Dublin 4, Ireland

\*shane.oconnell@mtu.ie

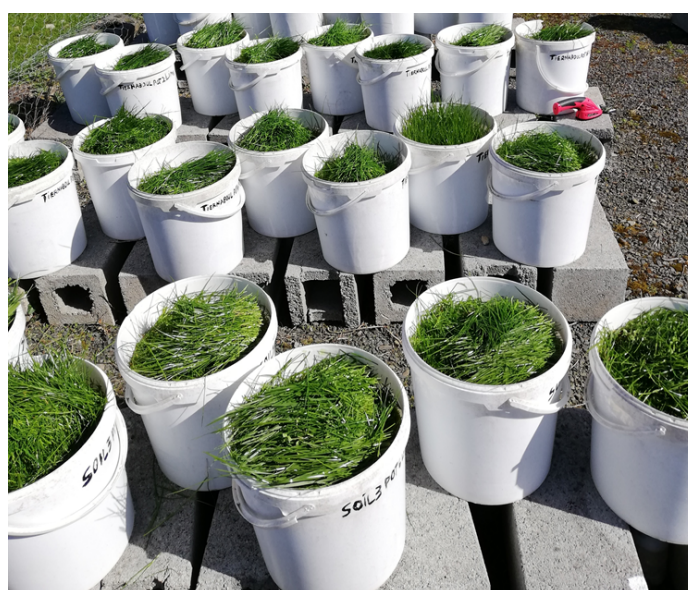

**Supplementary Figure S1: Modified lysimeter set-up**

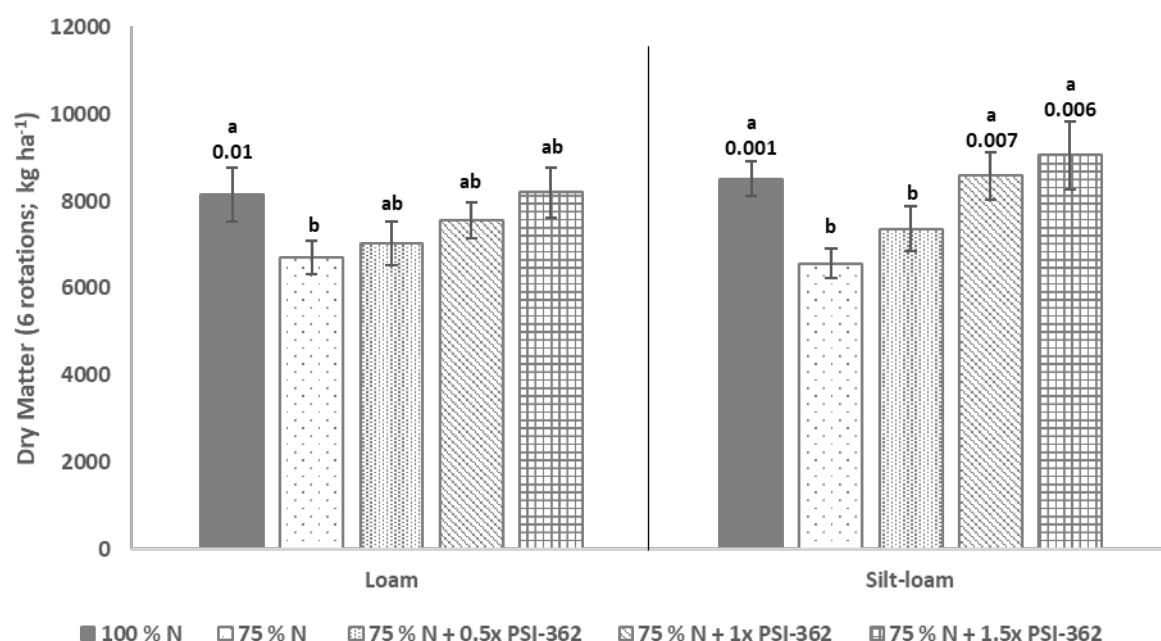

**Supplementary Figure S2:** Performance of PSI-362 coated fertilizer sorted according to soil type. Note: figures from the loam soils are the average of 2 soils (n = 6 for each soil; n = 12) over two years of six rotations, while figures for silt loam soils are the average of 4 soils (n = 6 for each soil; n = 24) over two years of six rotations. Values present means ± SE. Significance is indicated by different letters while P values represent significance levels compared to the 75 % N control (Kruskal-Wallis).

**Supplementary Table S1:** Soil attributes from the six different soils used for the modified lysimeter trials.

| Soil no. | Sand % | Silt % | Clay % | Soil Texture | pH  | P              | K              |
|----------|--------|--------|--------|--------------|-----|----------------|----------------|
|          |        |        |        | Class        |     | (mg/L; index*) | (mg/L; index*) |
| Soil 1   | 49     | 40     | 11     | Loam         | 6.9 | 42.9; 4        | 63.0; 2        |
| Soil 2   | 26     | 50     | 24     | Loam         | 6.7 | 6.8; 3         | 88.8; 2        |
| Soil 3   | 8      | 71     | 21     | Silt Loam    | 5.6 | 6.9; 3         | 51.2; 2        |
| Soil 4   | 25     | 62     | 13     | Silt Loam    | 7.1 | 38.6; 4        | 81.2; 2        |
| Soil 5   | 24     | 60     | 16     | Silt Loam    | 6.4 | 11.4; 4        | 116.0; 3       |
| Soil 6   | 33     | 53     | 14     | Silt Loam    | 7.0 | 30.6; 4        | 91.9; 2        |

\*Indexes range from 1 to 4 as described by Wall and Plunkett

**Supplementary Table S2:** The fertilizer regime applied to the modified lysimeter trials according to recommended rates by Wall and Plunkett

| Programme | Nutrient                            | Fertiliser | Month of Application |      |      |     |      |      |     |     |  |
|-----------|-------------------------------------|------------|----------------------|------|------|-----|------|------|-----|-----|--|
|           |                                     | Rate       | Feb                  | Mar  | Apr  | May | June | July | Aug | Sep |  |
| 100 % N   | N applied<br>(kg ha <sup>-1</sup> ) | 100 %      | 31                   | 54   | 54   | 56  | 24   | 24   | 24  | 37  |  |
|           | P applied<br>(kg ha <sup>-1</sup> ) | 100 %      | 10.5                 | -    | -    | -   | -    | -    | -   | -   |  |
|           | K applied<br>(kg ha <sup>-1</sup> ) | 100 %      | 21                   | -    | -    | -   | -    | -    | -   | -   |  |
| 75 % N    | N applied<br>(kg ha <sup>-1</sup> ) | 75 %       | 23                   | 40.5 | 40.5 | 42  | 18   | 18   | 18  | 28  |  |
|           | P applied<br>(kg ha <sup>-1</sup> ) | 100 %      | 10.5                 | -    | -    | -   | -    | -    | -   | -   |  |
|           | K applied<br>(kg ha <sup>-1</sup> ) | 100 %      | 21                   | -    | -    | -   | -    | -    | -   | -   |  |

**Supplementary Table S3:** Fertilizer regime, soil fertility (P and K) index and coordinates of the 2020 and 2021 field trials

| 2020 Field Trials                    |                            |                         |                            |                       |                       |                            |
|--------------------------------------|----------------------------|-------------------------|----------------------------|-----------------------|-----------------------|----------------------------|
|                                      | Farm 1                     |                         | Farm 2                     | Farm 3                | Farm 4                | Farm 5                     |
| P and K index                        | 3 & 4                      |                         | 3 & 3                      | 2 & 3                 | 4 & 3                 | 4 & 3                      |
| 100 % N Added (kg ha <sup>-1</sup> ) | 66.5                       |                         | 66.5                       | 66.5                  | 66.5                  | 66.5                       |
| 80 % N Added (kg ha <sup>-1</sup> )  | 53.0                       |                         | 53.0                       | 53.0                  | 53.0                  | 53.0                       |
| Coordinates                          | 53°22'26.2"N               |                         | 53°15'34.5"N               | 53°15'16.1"N          | 53°17'08.9"N          | 53°17'23.8"N               |
|                                      | 7°43'39.3"W                |                         | 7°32'53.2"W                | 7°34'46.4"W           | 8°52'50.1"W           | 8°52'19.0"W                |
| Days Growth                          | 46                         |                         | 39                         | 46                    | 43                    | 43                         |
| 2021 Field Trials                    |                            |                         |                            |                       |                       |                            |
|                                      | 1 <sup>st</sup> cut silage |                         | 2 <sup>nd</sup> cut silage |                       |                       | 3 <sup>rd</sup> cut silage |
|                                      | Farm 6                     | Farm 7                  | Farm 8                     | Farm 9                | Farm 10               | Farm 11                    |
| P and K index                        | 2 & 3                      | 3 & 3                   | 3 & 2                      | 3 & 2                 | 3 & 3                 | 3 & 2                      |
| P and K added (kg ha <sup>-1</sup> ) | C: 10.7 & 42.7             | C: 11 & 45<br>T: 9 & 54 | C: 8.3 & 33.7              | C: 8.0 & 36.6         | C: 9.5 & 42.7         | C: 8.1 & 36.5              |
|                                      | T: 8.5 & 51.2              |                         | T: 6.7& 40.2               | T: 6.1 & 36.6         | T: 7.3 & 43.9         | T: 6.1 & 36.5              |
| 100 % N Added (kg ha <sup>-1</sup> ) | 102.4                      | 112.6                   | 80.5                       | 76.8                  | 89.8                  | 76.5                       |
| Reduced N Added                      | 85.4<br>(17 % less N)      | 94.0<br>(20 % less N)   | 67.1<br>(17 % less N)      | 61.7<br>(21 % less N) | 73.2<br>(18 % less N) | 60.8<br>(21 % less N)      |
| Coordinates                          | 53°23'58.1"N               |                         | 53°17'50.2"N               | 53°24'29.5"N          | 53°19'29.5"N          | 53°32'47.9"N               |
|                                      | 7°34'27.9"W                |                         | 7°35'36.9"W                | 7°36'05.1"W           | 7°60'76.9"W           | 7°43'49.7"W                |
| Days Growth                          | 54                         |                         | 44                         | 45                    | 44                    | 45                         |
|                                      |                            |                         | 46                         |                       |                       |                            |

C = 100 % N control; T = PSI-362 treated N (at reduced N rate)

**Supplementary Table S4:** Weather Data for lysimeter and field trials.

|                                   | Feb   | Mar  | Apr  | May   | Jun  | Jul   | Aug   | Sep  | Oct   | Rainfall (sum) and soil T (average) |
|-----------------------------------|-------|------|------|-------|------|-------|-------|------|-------|-------------------------------------|
| <b>Lysimeters</b>                 |       |      |      |       |      |       |       |      |       |                                     |
| 2020 Rainfall (mm)                | -     | -    | -    | 18.6  | 67   | 121.4 | 134.4 | 64.4 | 185.2 | 591.0                               |
| 2020 10 cm Soil T (°C)            | -     | -    | -    | 12.5  | 14.5 | 16.7  | 17.3  | 15   | 11    | 14.5                                |
| 2021 Rainfall (mm)                | 181.6 | 70.6 | 23.8 | 135.6 | 26   | 97.8  | 90.6  | -    | -     | 626.0                               |
| 2021 Mean 10 cm Soil T (°C)       | 6.5   | 7.9  | 9.7  | 11.5  | 15.4 | 17.8  | 16.4  | -    | -     | 12.2                                |
| <b>Silage Harvesting Trials</b>   |       |      |      |       |      |       |       |      |       |                                     |
| <b>Farms 1, 2, 3 (2020 data)</b>  |       |      |      |       |      |       |       |      |       |                                     |
| Rainfall (mm)                     | -     | -    | -    | -     | -    | 126.3 | 114   | -    | -     | 240.3                               |
| LTA (mm)                          | -     | -    | -    | -     | -    | 71.1  | 86.1  | -    | -     | 157.2                               |
| Mean 10 cm Soil T (°C)            | -     | -    | -    | -     | -    | 15.5  | 15.8  | -    | -     | 15.7                                |
| <b>Farm 4, 5 (2020 data)</b>      |       |      |      |       |      |       |       |      |       |                                     |
| Rainfall (mm)                     | -     | -    | -    | -     | -    | 116.3 | 113.5 | -    | -     | 229.8                               |
| LTA (mm)                          | -     | -    | -    | -     | -    | 86.5  | 107.8 | -    | -     | 194.3                               |
| Mean 10 cm Soil T (°C)            | -     | -    | -    | -     | -    | 15.1  | 16.0  | -    | -     | 15.6                                |
| <b>Farm 6, 7, 8 (2021 data)</b>   |       |      |      |       |      |       |       |      |       |                                     |
| Rainfall (mm)                     | -     | -    | 25.5 | 107.4 | -    | -     | -     | -    | -     | 132.9                               |
| LTA (mm)                          | -     | -    | 65.9 | 69.2  | -    | -     | -     | -    | -     | 135.1                               |
| Mean 10 cm Soil T (°C)            | -     | -    | 7.8  | 10.5  | -    | -     | -     | -    | -     | 9.2                                 |
| <b>Farm 10 (2021 data)</b>        |       |      |      |       |      |       |       |      |       |                                     |
| Rainfall (mm)                     | -     | -    | -    | -     | 25.7 | 57.8  | -     | -    | -     | 83.5                                |
| LTA (mm)                          | -     | -    | -    | -     | 74.2 | 73.1  | -     | -    | -     | 147.3                               |
| Mean 10 cm Soil T (°C)            | -     | -    | -    | -     | 14.4 | 16.7  | -     | -    | -     | 15.6                                |
| <b>Farm 11 (2021 data)</b>        |       |      |      |       |      |       |       |      |       |                                     |
| Rainfall (mm)                     | -     | -    | -    | -     | 74.9 | 142.1 | -     | -    | -     | 217.0                               |
| LTA (mm)                          | -     | -    | -    | -     | 71.1 | 86.1  | -     | -    | -     | 157.2                               |
| Mean 10 cm Soil T (°C)            | -     | -    | -    | -     | 17.7 | 15.8  | -     | -    | -     | 16.8                                |
| <b>Pasture Grazing Trials</b>     |       |      |      |       |      |       |       |      |       |                                     |
| <b>Pasture site 1 (2021 data)</b> |       |      |      |       |      |       |       |      |       |                                     |
| Rainfall (mm)                     | -     | -    | -    | 95.7  | 29.8 | 116.3 | 113.5 | -    | -     | 355.3                               |
| LTA (mm)                          | -     | -    | -    | 75.3  | 79.6 | 86.5  | 107.8 | -    | -     | 349.2                               |
| Mean 10 cm Soil T (°C)            | -     | -    | -    | 10.7  | 14.9 | 15.1  | 16    | -    | -     | 14.2                                |
| <b>Pasture site 2 (2021 data)</b> |       |      |      |       |      |       |       |      |       |                                     |
| Rainfall (mm)                     | -     | -    | -    | 135.6 | 26   | 97.8  | 90.6  | -    | -     | 350.0                               |
| LTA (mm)                          |       |      |      | 64.8  | 69.8 | 65.9  | 82.0  |      |       |                                     |
| Mean 10 cm Soil T (°C)            | -     | -    | -    | 11.5  | 15.4 | 17.8  | 16.4  | -    | -     | 15.3                                |
| LTA (°C)                          |       |      |      | 12.1  | 15.1 | 16.6  | 16.1  |      |       |                                     |

Figures for LTA (long term averages) are included where available. Figures are only included for the months relevant to the trials

**Supplementary Table S5:** Total Dry Matter (kg ha<sup>-1</sup>) of 6 rotations according to year and soil type from the lysimeter trials

|           | 100 % N     | 75 % N     | 75 % N + 0.5x<br>PSI-362 | 75 % N + 1x<br>PSI-362 | 75 % N + 1.5x<br>PSI-362 |
|-----------|-------------|------------|--------------------------|------------------------|--------------------------|
| 2020 Loam | 6624 ± 268  | 5022 ± 394 | 5889 ± 222               | 6343 ± 399             | 6729 ± 426               |
| 2020 SL   | 7011 ± 355  | 5338 ± 253 | 6097 ± 432               | 6750 ± 268             | 7264 ± 419               |
| 2021 Loam | 10112 ± 769 | 8372 ± 480 | 8181 ± 756               | 8771 ± 229             | 9659 ± 638               |
| 2021 SL   | 9606 ± 372  | 7481 ± 382 | 8395 ± 747               | 10070 ± 674            | 10387 ± 1195             |

For Loam soils n = 12; for silt-loam soils n = 24. Numbers represent mean ± SE

**Supplementary Table S6:** Dry matter (kg ha<sup>-1</sup>) values for the individual farms from the silage trials

| Regime            | First Cut Silage Trials  |               |                |               |               |                |
|-------------------|--------------------------|---------------|----------------|---------------|---------------|----------------|
| Site              | <u>Farm 6</u>            | <u>Farm 7</u> |                |               |               |                |
| 100 % N           | 5050                     | 5600          |                |               |               |                |
| 80 % N + PSI-362  | 5120                     | 5850          |                |               |               |                |
| Regime            | Second Cut Silage Trials |               |                |               |               |                |
| Site              | <u>Farm 8</u>            | <u>Farm 9</u> | <u>Farm 10</u> |               |               |                |
| 100 % N           | 5100                     | 3998          | 4138           |               |               |                |
| 80 % N + PSI-362  | 4980                     | 4069          | 5167           |               |               |                |
| Regime            | Third Cut Silage Trials  |               |                |               |               |                |
| Site              | <u>Farm 1</u>            | <u>Farm 2</u> | <u>Farm 3</u>  | <u>Farm 4</u> | <u>Farm 5</u> | <u>Farm 11</u> |
| 100 % N           | 5216                     | 4200          | 3556           | 3529          | 4320          | 4480           |
| 80 % N + PSI-362  | 4992                     | 3984          | 3388           | 3600          | 4248          | 4530           |
| 100 % N + PSI-362 | 6021                     | 4488          | 4200           | 4200          | NA            | NA             |

**Supplementary Table S7:** Daily grass growth (kg DM ha<sup>-1</sup> day<sup>-1</sup>) for the two pasture grazing sites. Each value represents the average of 5 grazings per field.

| Pasture Site 1 |                  | Pasture Site 2 |                  |
|----------------|------------------|----------------|------------------|
| 100 % N        | 75 % N + PSI-362 | 100 % N (PU)   | 75 % N + PSI-362 |

|                 |      |                 |      |                |       |                |       |
|-----------------|------|-----------------|------|----------------|-------|----------------|-------|
| <b>Field 1</b>  | 62.0 | <b>Field 2</b>  | 61.3 | <b>Field 1</b> | 64.8  | <b>Field 2</b> | 72.1  |
| <b>Field 3</b>  | 55.0 | <b>Field 4</b>  | 57.0 | <b>Field 3</b> | 120.0 | <b>Field 4</b> | 126.7 |
| <b>Field 5</b>  | 59.2 | <b>Field 6</b>  | 50.5 |                |       |                |       |
| <b>Field 7</b>  | 54.3 | <b>Field 8</b>  | 71.1 |                |       |                |       |
| <b>Field 9</b>  | 83.4 | <b>Field 10</b> | 51.5 |                |       |                |       |
| <b>Field 11</b> | 58.6 | <b>Field 12</b> | 56.6 |                |       |                |       |
| <b>Field 13</b> | 59.8 | <b>Field 14</b> | 82.7 |                |       |                |       |
| <b>Field 15</b> | 59.8 | <b>Field 16</b> | 40.6 |                |       |                |       |
| <b>Field 17</b> | 75.9 | <b>Field 18</b> | 63.4 |                |       |                |       |
| <b>Field 19</b> | 58.6 | <b>Field 20</b> | 57.6 |                |       |                |       |
| <b>Field 21</b> | 57.5 | <b>Field 22</b> | 53.2 |                |       |                |       |
| <b>Field 23</b> | 46.3 | <b>Field 24</b> | 51.3 |                |       |                |       |
| <b>Field 25</b> | 46.3 | <b>Field 26</b> | 62.7 |                |       |                |       |
| <b>Field 27</b> | 73.1 | <b>Field 28</b> | 64.9 |                |       |                |       |
| <b>Field 29</b> | 68.2 | <b>Field 30</b> | 67.2 |                |       |                |       |
| <b>Field 31</b> | 64.9 | <b>Field 32</b> | 65.6 |                |       |                |       |
| <b>Field 33</b> | 47.1 | <b>Field 34</b> | 51.0 |                |       |                |       |
| <b>Field 35</b> | 66.7 |                 |      |                |       |                |       |

PU = protected urea
